# Supplementary material
Source: PubMed Central journal article supplement (PMC3348549)
Supplement: NIHMS138386-supplement-1_si_001.pdf [file NIHMS138386-supplement-1_si_001.pdf]

## Compositional analysis on heparin/heparan sulfate interacting with FGF•FGFR complexes

Supporting information:

**Table 1** Comparison of disaccharide composition of HS dp10 that binds to different FGFs and different FGF•FGFR complexes. The percentages in bold correspond to the prominent disaccharides corresponding to >50% of the composition.

| Disaccharide composition | 0S         | NS         | 6S         | 2S | NS6S       | NS2S       | 2S6S       | TriS        |
|--------------------------|------------|------------|------------|----|------------|------------|------------|-------------|
| FGF1                     | <b>24%</b> | 9%         | 12%        | 0% | 16%        | 7%         | 1%         | <b>31%</b>  |
| FGF1•FGFR1               | 7%         | <b>31%</b> | 19%        | 3% | <b>24%</b> | 7%         | 2%         | 2%          |
| FGF2                     | <b>23%</b> | <b>20%</b> | 10%        | 0% | 16%        | <b>23%</b> | 1%         | 8%          |
| FGF2•FGFR1               | 5%         | <b>29%</b> | 14%        | 2% | 20%        | <b>25%</b> | 2%         | 3%          |
| FGF4                     | <b>16%</b> | 14%        | <b>18%</b> | 0% | 12%        | 10%        | 0%         | <b>31%</b>  |
| FGF4•FGFR2c              | 0%         | 13%        | 6%         | 0% | 8%         | <b>30%</b> | 21%        | <b>22%</b>  |
| FGF5                     | 12%        | 15%        | 10%        | 0% | 0%         | <b>18%</b> | 0%         | <b>45%</b>  |
| FGF5•FGFR1c              | 0%         | <b>16%</b> | 12%        | 5% | 3%         | <b>22%</b> | <b>27%</b> | <b>16%</b>  |
| FGF 6                    | 8%         | 5%         | 7%         | 0% | <b>19%</b> | 12%        | 1%         | <b>49%</b>  |
| FGF6•FGFR2c              | 0%         | <b>32%</b> | 27%        | 0% | 6%         | <b>28%</b> | 4%         | 2%          |
| FGF8b                    | <b>24%</b> | 11%        | 10%        | 0% | <b>19%</b> | 13%        | 1%         | <b>23%</b>  |
| FGF8b•FGFR2c             | 0%         | 0%         | 0%         | 0% | 0%         | 0%         | 0%         | <b>100%</b> |
| FGF10                    | <b>58%</b> | 13%        | 29%        | 0% | 0%         | 0%         | 0%         | 0%          |
| FGF10•FGFR2              | 0%         | 0%         | 0%         | 0% | 0%         | 0%         | 0%         | <b>100%</b> |
| b                        |            |            |            |    |            |            |            |             |
| FGF17                    | <b>26%</b> | <b>26%</b> | 12%        | 0% | 0%         | 15%        | 0%         | 21%         |
| FGF17•FGFR1c             | 4%         | 13%        | <b>22%</b> | 0% | 9%         | <b>19%</b> | <b>29%</b> | 5%          |
| HS dp 10                 | 12%        | <b>39%</b> | <b>22%</b> | 3% | 13%        | 4%         | 2%         | 4%          |
